# Supplementary material
Source: ML conference proceedings conference paper supplement (https://openaccess.thecvf.com/content/ICCV2025/html/Abdullahu_Visual_Interestingness_Decoded_ICCV_2025_paper.html)
Supplement: Supplementary file 1 [file Abdullahu_Visual_Interestingness_Decoded_ICCV_2025_supplemental.pdf]

# Visual Interestingness Decoded: How GPT-4o Mirrors Human Interests

## Supplementary Material

Due to space constraints, certain images, examples, and explanations have been moved to the appendix. Sec. A (Sec. 4.1) presents an example of the systematic error observed in GPT-4o, followed by Sec. B (Sec. 4.1), which illustrates error cases involving Llama 3.2. Sec. C (Sec. 5) provides a qualitative overview of how the learning-to-rank models evaluated the images. Subsequently, Sec. D (Sec. 4 and 5) applies the same methodology from the main paper to the Int10k dataset. We also present results for DINOv2 in Sec. E (Sec. 5) and provide a detailed explanation of the CuPL method from [37] in Sec. F (Sec. 4.3).

### A. Systematic Error of GPT-4o

For 36% of the image pairs, GPT-4o always reported the second image as more interesting. Fig. 6 illustrates an example of a systematic error. GPT-4o consistently viewed the second image in all five runs as more interesting. Such image pairs were excluded from subsequent experiments; only those pairs where GPT-4o’s preference remained consistent, regardless of image position, were included.

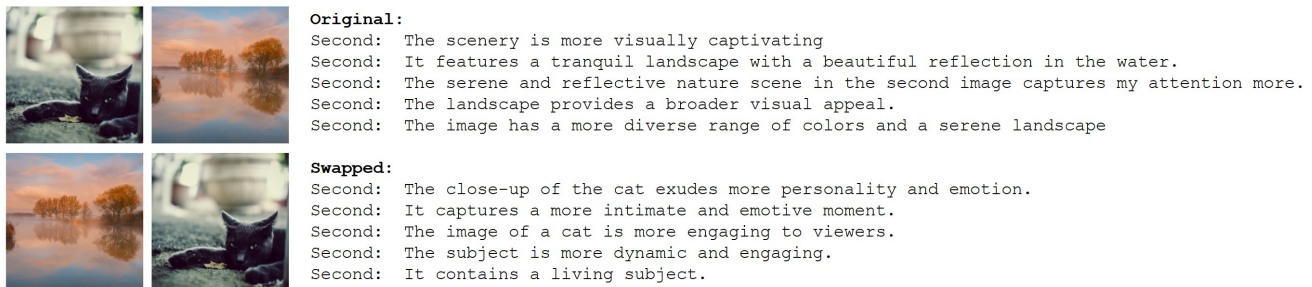

Figure 6. An example of GPT-4o’s systematic error. In all five runs, GPT-4o consistently viewed the second image as more interesting.

### B. Llama 3.2 Current Limitations for Visual Inputs

Since Llama 3.2 does not currently support multiple image inputs, we combined both images into a single combined image as input for the model. Unfortunately, this workaround delivered unreliable results. For example, the model would select the first image as more interesting but provide an explanation for the second one. Examples of such inconsistencies are shown in Fig. 7. In the first image pair, the answers and explanations for the third run are incorrect (marked in bold). The second image pair is even more problematic, as none of the answers or explanations match. Due to these issues, we concluded that comparing Llama 3.2 with GPT-4o would be unfair and decided to exclude Llama 3.2 from the image pair comparisons.

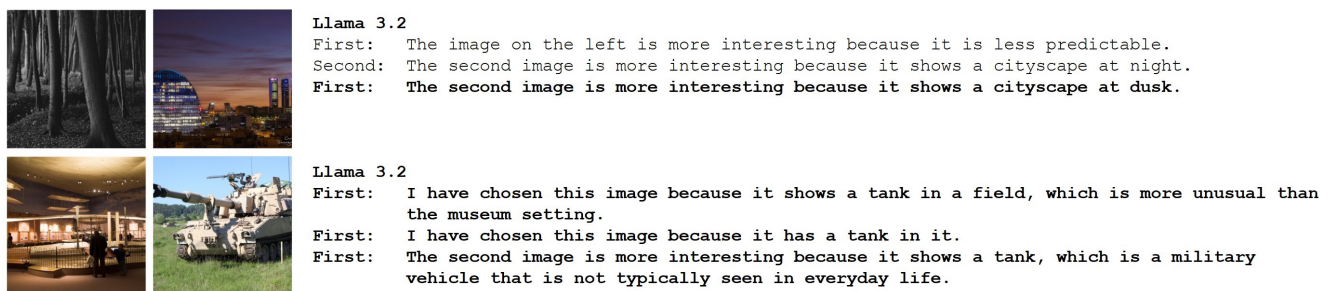

Figure 7. Examples of Llama 3.2’s inconsistencies where incorrect runs are marked in bold. The answers and explanations for the third run are incorrect in the first image pair. The second image pair is even more problematic, as none of the answers or explanations match.

## C. Ranking of Flickr Images

Fig. 8 provides an example of how the computational models ranked Flickr sample images (12 out of 310 images) from the test set for each concept (see Sec. 5). Qualitatively, all models—except the memorability model—demonstrate a similar trend: landscapes and aesthetically pleasing images dominate the top ranks, while images featuring people and cars rank lower. This observation aligns with findings from [1], suggesting that landscapes and aesthetic images tend to appeal broadly. In contrast, images of people or events are often of more subjective interest.

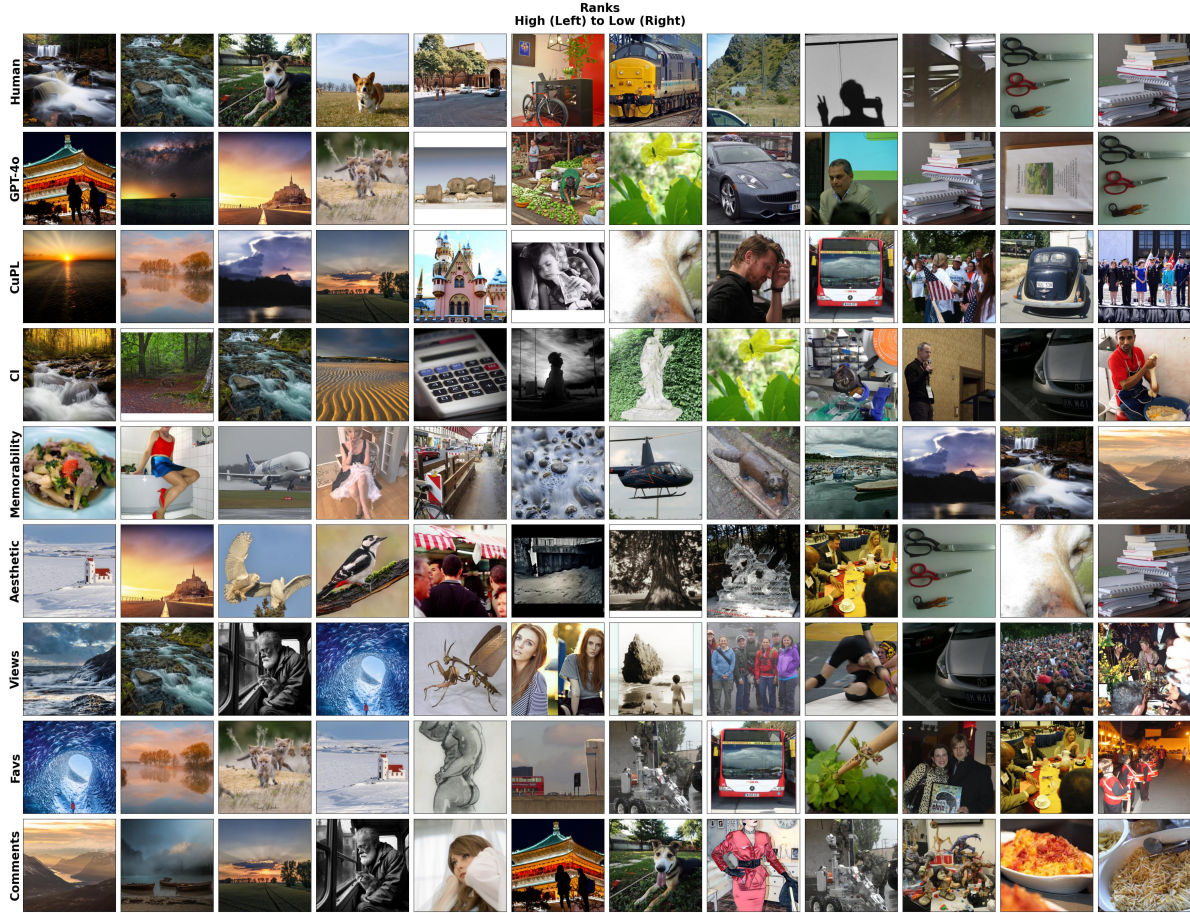

Figure 8. Flickr image ranking based on the computational models for each approach (see Sec. 5). Qualitatively, all models—except the memorability model—exhibit a similar trend in ranking images. Landscapes and aesthetically pleasing images dominate the top ranks, whereas images featuring people and cars rank lower.

## D. Comparison and Relation to Int10k

We conducted similar experiments to compare various relationships and approaches using the Int10k dataset [9] under a consistent setup described in Sec. 4 and 5. Specifically, we used video frames from the test set, spanning videos 52 to 63. We created video-specific frame pairs from these frames, ensuring each frame appeared five times within the set of frame pairs. GPT-4o annotated 2,048 out of 2,555 image pairs, considering systematic errors.

Fig. 9 provides an example of how the computational models ranked Int10k sample images (12 out of 514 images) from the test set for each concept (see Sec. 5). The results using movie images differ significantly from those obtained with everyday images from Flickr (see Fig. 8). While the Int10k dataset contains numerous dark or completely black images, the Flickr dataset features a broader range of everyday scenes. The Int10k dataset, focusing on movie trailers, requires more contextual understanding, as preferences in this domain are even more subjective. In contrast, the Flickr dataset consists of everyday images evaluated primarily based on visual appeal.

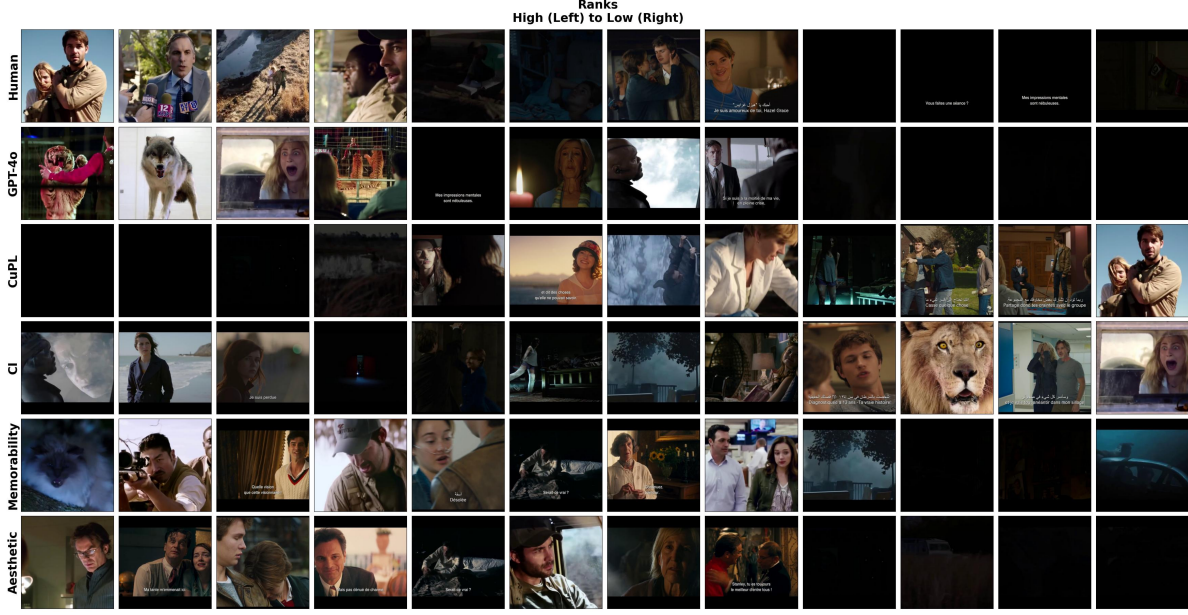

Figure 9. Int10k image ranking based on the computational models for each approach. The images from movie trailers differ significantly from the everyday images found on Flickr. Notably, many of the trailer images are dark or entirely black. While GPT-4o delivers good results in this context, CuPL exhibits limitations, as it often considers black images interesting.

Quantitative analysis of the annotations across different approaches reveals that the GPT-4o and the VILA aesthetics model align most closely with human judgments, followed by the memorability model (see Tab. 5). However, the level of agreement is considerably lower than that observed for Flickr images. The performance of CI, which is trained on Flickr images, underscores the domain gap when applied to video summarization tasks. Similarly, CuPL, relying on CLIP embeddings, highlights its limitations in this context—particularly with very dark or black images mistakenly classified as interesting.

The learning-to-rank model aligns closely with the annotations. As with previous results, GPT-4o and the VILA aesthetics model perform best when evaluated against human ground truths. Notably, GPT-4o and the model trained on human annotations achieve similar performance. However, the low accuracy of 59.3% highlights the subjectivity associated with opinions on movie trailers. It is worth mentioning that GPT-4o performs better than all other models for both the Flickr images and Int10k. The Spearman rank correlation results demonstrate a low association level across all models, with negative associations observed for CI and CuPL. From the perspective of GPT-4o ground truths, the aesthetic model again performs best after the GPT-4o model. This trend is also evident in the Spearman rank correlation.

| Group                       | Model        | Annotations (Sec. 4) |               | Learning to Rank (Sec. 5)           |                                   |                                     |                                   |
|-----------------------------|--------------|----------------------|---------------|-------------------------------------|-----------------------------------|-------------------------------------|-----------------------------------|
|                             |              | $A^{(H,x)}$          | $A^{(G,x)}$   | $Acc.^{(H)}$                        | $r_S^{(H)}$                       | $Acc.^{(G)}$                        | $r_S^{(G)}$                       |
| <b>Human</b>                | Human        | -                    | 60.1 %        | $59.3 \pm 2.5 \%$                   | -                                 | $57.3 \pm 2.0 \%$                   | $0.28 \pm 0.09$                   |
| <b>LMMs</b>                 | GPT-4o       | <b>60.1 %</b>        | -             | <b><math>59.2 \pm 2.1 \%</math></b> | <b><math>0.28 \pm 0.09</math></b> | $78.7 \pm 2.0 \%$                   | -                                 |
|                             | CuPL         | 37.6 %               | 37.2 %        | $37.4 \pm 1.6 \%$                   | $-0.36 \pm 0.11$                  | $38.8 \pm 2.3 \%$                   | $-0.24 \pm 0.10$                  |
| <b>Computational Models</b> | CI           | 44.6 %               | 42.1 %        | $43.2 \pm 1.9 \%$                   | $-0.25 \pm 0.10$                  | $39.8 \pm 2.2 \%$                   | $-0.25 \pm 0.10$                  |
|                             | Memorability | 54.3 %               | 50.1 %        | $56.5 \pm 2.8 \%$                   | $0.16 \pm 0.10$                   | $51.0 \pm 3.2 \%$                   | $-0.01 \pm 0.08$                  |
|                             | Aesthetic    | 59.8 %               | <b>67.5 %</b> | $58.9 \pm 2.0 \%$                   | $0.27 \pm 0.11$                   | <b><math>64.4 \pm 1.8 \%</math></b> | <b><math>0.45 \pm 0.08</math></b> |

Table 5. GPT-4o achieves the highest agreement  $A^{(\cdot,x)}$  among all models when evaluated using human responses as ground truth. On the right, we show the model’s accuracy  $Acc.^{(\cdot)}$  on the image pairs. The global ranking shows a weak but positive Spearman correlation ( $r_S^{(\cdot)}$ ) with human and GPT-4o annotations, indicating some generalization beyond pairwise comparisons. The CI and CuPL models exhibit lower accuracy and negative correlation, highlighting their limitations in the context of video summarization.

## E. DINOv2 Embeddings

We also conducted experiments using DINOv2 ('dinov2\_vitb14') embeddings [33]. The results are presented in Tab. 6. It can be seen that regardless of the data set, whether Flickr or Int10k, the performance is better with the CLIP embeddings. This performance difference may be due to CLIP's training on text-image pairs, which provided additional supervision, whereas DINOv2 was trained purely in a self-supervised manner on images.

| Model  | Flickr              |              | Int10k              |              |
|--------|---------------------|--------------|---------------------|--------------|
|        | CLIP                | DINOv2       | CLIP                | DINOv2       |
| Human  | <b>77.5 ± 2.5 %</b> | 67.1 ± 3.5 % | <b>59.3 ± 2.3 %</b> | 57.3 ± 2.0 % |
| GPT-4o | <b>84.8 ± 2.5 %</b> | 68.3 ± 2.9 % | <b>78.7 ± 2.0 %</b> | 70.7 ± 1.7 % |

Table 6. We compared the performance of CLIP and DINOv2 on the Flickr and Int10k datasets using the human and GPT-4o models on their respective ground truths. The results indicate that CLIP outperforms DINOv2 on both datasets.

## F. CuPL in Detail

We discussed relationships with various approaches in Sec. 4.3. Due to space limitations, we only briefly introduced the zero-shot learning model, as it is just one of many models assessed. We utilize the Customized Prompts via Language (CuPL) method from [37] to generate prompts to evaluate the interestingness of an image. By querying a Large Language Model (LLM)—in this case, GPT-4o—with questions such as "Describe what an interesting image looks like," we receive various responses. The goal is to generate multiple image prompts from a small set of handcrafted prompts, as follows:

- Describe what a(n) interesting image looks like:
- How can you identify a(n) interesting image?
- What does a(n) interesting image look like?
- Describe a(n) interesting image from the internet:
- A caption of a(n) interesting image:

Following the approach in [37], we initially created 500 image prompts (100 prompts each). After removing duplicates and highly similar prompts, 250 unique image prompts remained (see Sec. F.1). Using CLIP, we compute text embeddings for these image prompts and take the average of the embeddings as a general text representation for *interestingness*. The similarity between an image's CLIP embeddings and the average CLIP embeddings of its image prompts is computed using cosine similarity. This calculation produces an interestingness score for each image.

An example is provided in Fig. 10, where image prompts with the highest cosine similarity are most similar to the image. However, a limitation of this approach is that a cosine similarity score is always generated, even when the text does not accurately match the image. This can be observed in the image prompts with a low cosine similarity, which may still produce a positive nonzero similarity despite lacking relevance to the image content.

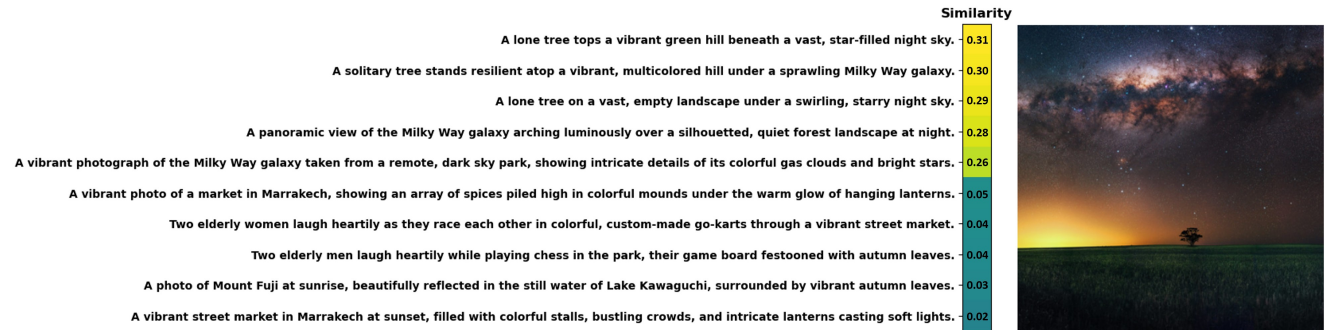

Figure 10. The five most similar and five least similar image prompts for the image are shown. The prompt with the highest cosine similarity (highlighted in yellow) has a value of 0.31, making it the most similar. Conversely, the prompt with the lowest cosine similarity (highlighted in green) has a value of 0.02, making it the least similar. Notably, the top five image prompts closely match the given image.

## F.1. Image Prompts

A visually striking image featuring a double rainbow arching over a bustling, colorful city market at sunset.

An interesting image might capture a breathtaking landscape under a vivid sunset, with the intense colors reflected in a tranquil lake, creating a stunning and memorable visual effect.

An interesting image might feature a surreal desert landscape with a vibrant sunset and silhouettes of exotic animals.

An interesting image might capture a moment of dynamic motion, such as a dancer in mid-air, with vibrant colors and a blurred background to emphasize movement.

An interesting image might feature an unexpected combination of elements, such as a cat playing chess, set against a vibrant, colorful background.

An interesting image might feature an unexpected combination, such as a zebra with colorful stripes under a vibrant sunset sky.

A winding river cuts through a vibrant autumn forest with soaring birds and scattered rays of sunshine piercing through the trees.

A vibrant street scene at dusk in Tokyo, with neon lights reflecting off rain-soaked streets.

An interesting image might show a colorful sunset behind an ancient, mysterious castle perched on a rugged cliff, with a dramatic sky.

An interesting image might contain a captivating contrast, like the vivid colors of a hot air balloon floating over a misty, grey mountain landscape.

An interesting image might feature an unexpected moment, such as a cat curiously peeking out from a pile of autumn leaves.

An interesting image might capture a stunning lightning strike over a vibrant cityscape at night.

An interesting image captures an unusual perspective, vibrant colors, and dynamic action or evocative emotion that holds a viewer's attention.

An interesting image might be a rainbow-colored waterfall in a lush forest, drawing the eye with vibrant contrasts and a sense of wonder.

A man wearing a vibrant, multicolored suit juggling flaming torches at sunset on a beach.

An interesting image might show a person playing chess underwater surrounded by colorful fish.

A vibrant street market in Marrakech at sunset, filled with colorful stalls, bustling crowds, and intricate lanterns casting soft lights.

A surreal photo montage blending a cityscape with a forest, where skyscrapers transform into trees under a starlit sky.

An interesting image might capture an unexpected moment between wildlife, show a stunning landscape under dramatic lighting conditions, or depict a compelling juxtaposition of modern and historical elements in an urban setting.

An interesting image features an unexpected combination, such as a cat with butterfly wings perched on a colorful flowering cactus.

An interesting image might feature an unexpected combination, such as a zebra with colorful stripes under a vibrant aurora in a snowy landscape.

An interesting image might depict a surreal landscape blending natural elements with urban features, enriched by vibrant, contrasting colors.

An interesting image might feature an unexpected combination like a cat with butterfly wings perched on a colorful flower.

A visually striking image featuring a juxtaposition of ancient architecture and modern technology under a vibrant sunset sky.

An interesting image might feature an unexpected combination of elements, such as a lion lounging in a classic library filled with books.

An interesting image captures a moment of unexpected interaction between a cat and a butterfly under a vibrant rainbow.

An interesting image might show a surreal landscape with a colorful sky and giant, oversized flowers dotting the foreground.

An interesting image features a man in a vibrant hot air balloon floating over a lush, misty forest at sunrise.

An image of a solar eclipse with the silhouette of a city skyline in the foreground creates an interesting scene.

An interesting image features an unexpected interaction between a cat and a dolphin, with vivid colors and dynamic ocean waves in the background.

An interesting image might show a juxtaposition of opposites, such as a vividly colored parrot perched in a stark, snowy landscape.

A dramatic landscape under the Northern Lights, featuring a crystal-clear lake reflecting the vivid colors in the sky.

An interesting image might capture a lightning bolt striking a tree in a vibrant sunset backdrop, highlighting the stark contrasts between the electric energy and calm nature.

An interesting image could feature an unexpected juxtaposition, such as a cat sitting calmly in a tiny shopping cart, surrounded by colorful grocery items.

A mesmerizing night sky filled with vivid aurora borealis over a serene mountain landscape, reflecting in a crystal-clear lake below.

An interesting image might capture a vivid sunset over a bustling cityscape, contrasting natural beauty with urban life.

An interesting image might feature an unexpected combination, like a cat wearing goggles and sitting in a tiny airplane, set against a vibrant sunset background.

A tornado forms over an ocean at sunset, creating a stunning contrast of dark swirling winds against the colorful sky.

An interesting image might feature a surreal scene with a man floating in a colorful hot air balloon over a cityscape made entirely of books.

An image of a lightning strike illuminating an ancient forest under a starry night sky.

An interesting image captures a rare celestial event, like a lunar eclipse, framed by the silhouette of an ancient tree.

A surreal landscape where floating islands drift above an ocean, under a purple sky dotted with three moons.

An interesting image might capture an unexpected moment, like a dog intently watching a butterfly, creating a charming and engaging scene.

An interesting image features a stark contrast of colors with the silhouette of a tree against a vibrant sunset background.

A surreal landscape merging a city skyline with a forest, illuminated by a glowing sunset.

A captivating image featuring a serene lake reflecting the vibrant colors of a sunset, with silhouettes of birds flying across the sky.

An interesting image might depict an unexpected interaction between wildlife and urban settings, capturing the contrast and coexistence in a single, visually compelling frame.

An interesting image could feature a vibrant hot air balloon festival with colorful balloons dotting a clear blue sky, contrasting with a vivid sunset.

An interesting image features an unusual combination of elements, such as a cat playing chess, which captivates attention through its unexpectedness or creativity.

An interesting image might show an elephant painting with a brush, capturing both the elephant's focus and the vibrant colors on canvas.

An interesting image captures a rare natural phenomenon, such as a solar eclipse, with vivid colors and dynamic composition.

An interesting image features a vibrant sunset over a bustling cityscape, reflecting deep oranges and pinks against modern skyscrapers.

An interesting image features a cat wearing a detective hat and magnifying glass, investigating a map spread across a table.

An interesting image might feature an unexpected juxtaposition, such as a cat sitting calmly in a field of wildflowers under a stormy sky.

An interesting image captures a rare moment, such as a fox hunting in mid-leap or vibrant street art on a bustling city corner.

An interesting image might feature a dramatic juxtaposition like a dandelion growing through a crack in a vibrant urban mural, highlighting the contrast between nature and human creativity.

An interesting image might show a hidden waterfall in a vibrant forest, with sunlight filtering through the leaves and creating patterns on the water.

An interesting image might feature a dramatic clash of thunderstorms at sunset, with vivid lightning bolts illuminating dark, swirling clouds against a fiery orange sky.

An interesting image might capture a rare moment, such as a striking sunset behind a castle ruins, creating a visual narrative filled with color and history.

An interesting image could be a striking macro shot of dew on a spiderweb, capturing the intricacy of the web and the shimmering droplets.

An interesting image might show a vibrant sunset behind an ancient, twisted tree, casting long shadows over an undulating, poppy-filled meadow.

An interesting image might capture a rare natural phenomenon, such as a double rainbow in a dramatic landscape, adding a sense of awe and color contrast.

An image of a fox perched on a colorful hot air balloon floating above ancient ruins under a starry sky creates an interesting visual.

An interesting image could show a vibrant sunset behind an ancient, mysterious castle perched on a cliff, with wildflowers in the foreground swaying in a gentle breeze.

An interesting image might show a juxtaposition of old and new architecture in a bustling cityscape at sunset, enhancing contrast and depth.

An interesting image might feature an unexpected combination of elements, such as a zebra walking through a vibrant cityscape.

An interesting image could feature a vibrant street art mural under a bridge, combining vivid colors and urban charm.

A mesmerizing image could depict an abandoned amusement park at twilight, with eerie lighting and overgrown paths inviting exploration.

An interesting image could be a stunning aerial shot of a vividly colored coral reef surrounded by deep blue ocean waters.

An interesting image could be a vibrant close-up photo of a chameleon blending into a colorful flower garden.

An interesting image might feature an unusual combination such as a cat wearing a monocle or a surreal landscape blending a desert with an ocean.

An interesting image could be a sunset blended with city skyline silhouette, creating a burst of colors against dark structures.

An interesting image might feature an unexpected combination of elements, such as a zebra striped with vivid colors instead of the typical black and white.

An interesting image could depict an unusual combination, such as a cat wearing a tiny astronaut helmet, set against a vibrant, colorful background.

An interesting image could be a close-up shot of a colorful chameleon on a vibrant green leaf, highlighting its textured skin and vivid colors.

An interesting image might capture an unusual reflection in a city puddle, showing skyscrapers upside down.

An interesting image might feature an unusual combination of elements, such as a cat playing a piano under a starry sky.

An interesting image could feature a captivating optical illusion that challenges perception.

An interesting image might capture a rare moment, such as a bird catching its prey, set against a vivid sunset.

An interesting image could feature an unusual combination of elements, such as a cat looking through a magnifying glass.

An interesting image could show a rare natural phenomenon, such as the Northern Lights reflected in a tranquil lake, under a starry sky.

A photo of a vibrant street art mural on an unexpected urban surface, like the side of a train.

An interesting image could be one that captures an unusual perspective, like a close-up of a pattern in ice or a vibrant street scene from an overhead view.

An interesting image might show an unexpected interaction between a cat and a dolphin, capturing their curiosity and engagement.

An interesting image could feature an unexpected combination, such as a cat wearing a tiny astronaut helmet, sitting in a miniature rocket.

An interesting image could feature a stunning juxtaposition, such as a tree growing through an abandoned car.

An interesting image might feature an unusual combination of elements such as a cat riding a bicycle.

A colorful hot air balloon festival at sunset with a picturesque mountain backdrop.

An interesting image might feature a stunning landscape with vibrant colors and a dramatic sky, creating a visual impact.

An interesting image could be a surreal landscape blending night and day in one scene, with a staircase leading from a dark forest up to a bright, sunny sky.

An interesting image could be a close-up photo of a snowflake, highlighting its intricate patterns.

An interesting image might feature an unexpected combination of elements, such as a cat riding a bicycle, to capture the viewer's attention and spark curiosity.

An interesting image might feature an unexpected combination of elements, like a cat playing a musical instrument.

An interesting image could feature an unexpected twist or detail, such as a cat peering curiously out of a backpack in a bustling city.

An interesting image might feature an unexpected combination of elements, such as a dog wearing sunglasses, playing chess in a bustling city park.

A photograph of a sky filled with colorful hot air balloons at sunset, each balloon uniquely patterned, floating above a serene, wide landscape.

A panoramic view of the Milky Way galaxy arching luminously over a silhouetted, quiet forest landscape at night.

A cat sitting in a tiny cardboard replica of a tank, appearing to peer out of the cannon hole.

A long-exposure photograph of a forest with fireflies creating trails of light throughout the dark trees.

A mesmerizing image of the Northern Lights over a snowy landscape, casting an ethereal green glow across the sky.

A breathtaking photo of the Milky Way arching over a serene mountain lake, reflecting the stars in its still waters.

A panoramic view from the top of a skyscraper showing a bustling cityscape at sunset, with long shadows and glowing city lights starting to twinkle.

A stunning underwater photograph showing a pod of dolphins swimming around a sunken airplane, with colorful coral formations in the background.

A breathtaking image showing a cat looking out over a cityscape at sunset, with the city lights beginning to twinkle under a vivid, orange sky.

A breathtaking image featuring a vast field of blooming lavender under a sunset sky, with a lone tree standing prominently in the background.

A vibrant photo of the Milky Way galaxy arching over an illuminated tent on a mountain, showcasing the vast beauty of the cosmos.

A brightly colored mural on an urban street corner featuring a giant octopus with its tentacles stretching across multiple buildings.

A vibrant photo of a colorful hot air balloon festival, with dozens of balloons in the sky, showcasing a wide array of patterns and colors against a clear blue background.

A striking image showing a snow-covered village with brightly-colored houses under the northern lights, casting a magical glow in the night sky.

A serene lake reflecting a colorful sunset sky with a lone canoe floating gently on the calm water.

An artistically blurred photo of a busy city street at night, featuring vibrant neon lights and streaks of headlights from the motion of cars.

A stunning image capturing the moment a lightning bolt strikes near the Statue of Liberty, dramatically illuminating the dark, stormy sky around it.

A cat wearing a tiny astronaut helmet sitting inside a miniature replica of a spaceship, surrounded by star-shaped glitter.

A panoramic view of the Milky Way arching over a silhouetted mountain range, with the vibrant colors of the galaxy reflected in a serene lake below.

A photo of a cat stretched out on a bookshelf among various classic books, seemingly reading one of them.

A vibrant photograph of the Milky Way galaxy taken from a remote, dark sky park, showing intricate details of its colorful gas clouds and bright stars.

A timelapse photo of a busy city intersection at night, capturing light trails from moving vehicles that create a vibrant network of glowing lines against the dark backdrop of the city.

An image showing a cat peering through a hole in a colorful crocheted blanket, with only its eyes and whiskers visible.

A high-resolution image of a cat wearing sunglasses and a bow tie while sitting at a table with a tiny cup of coffee.

A breathtaking photograph showcasing a murmuration of starlings, forming a perfect heart shape in the dusk sky.

A cat sitting in a circle of dominoes, which are set up in intricate patterns, just before they start to fall.

A panoramic view of an aurora borealis over a serene, snow-covered village, with the colorful lights of the aurora reflecting off a frozen lake.

A vibrant aerial photo showing a maze of colorful tulip fields in the Netherlands, forming a patchwork quilt of bright reds, pinks, yellows, and purples.

A vibrant photo of the Milky Way galaxy seen from a crystal-clear mountain lake, reflecting stars in its serene waters.

A panoramic view of a bustling city skyline at sunset, with the golden hues of the sun reflecting off the glass facades of the skyscrapers.

A surreal digital artwork depicting a giant octopus perched atop a tall city skyscraper, as tiny figures parachute away in the colorful sunset sky.

A stunning photograph of the Milky Way arcing over a serene, glowing campsite in the mountains, capturing the vastness of the sky contrasted with the cozy, illuminated tents.

A surreal painting depicting an elephant balanced on a tiny blue planet in space, surrounded by butterflies.

A breathtaking photo of the Northern Lights glowing vividly over a snowy, serene Lapland landscape, with a cozy cabin illuminated softly in the foreground.

A cat wearing a tiny astronaut helmet, floating inside a zero-gravity simulation chamber.

A vibrant digital artwork depicting a futuristic city skyline at twilight, with flying cars zooming between skyscrapers lit by neon lights.

A panoramic image of the vibrant Northern Lights (Aurora Borealis) dancing above a serene snowy landscape illuminated under a starry sky.

A vivid photograph of the northern lights over a snowy mountain landscape in Norway, where the sky is painted in vibrant greens and purples.

A colorful mural of a giant octopus stretching its tentacles across a four-story building, blending into a cityscape at sunset.

A stunning image showing the vibrant contrast of a vivid sunset behind the silhouetted New York skyline, casting a warm glow over the city.

A vibrant image showing a murmuration of starlings forming a large, twisting shape in the sky at sunset, with vivid orange and purple hues in the background.

A surreal photograph showing an elephant using its trunk to paint a colorful landscape on a canvas, set in a misty forest.

A surreal image showing a giant cat lounging atop a skyscraper as city dwellers walk by, unfazed.

A stunning photograph of a clear glass bridge suspended over a deep canyon, with a panoramic view of the mountains under a vibrant sunset sky.

A stunning image capturing the Aurora Borealis over a crystal clear lake, reflecting the vibrant colors in the night sky.

A surreal digital art piece depicting a giant octopus tangled around a lighthouse, with glowing tentacles under a starry night sky.

A breathtaking image of the Milky Way viewed from a crystal-clear lake's mirrored surface, combining the galaxy's sparkling stars with their vivid reflection in the water.

A vibrant photo of a market in Marrakech, showing an array of spices piled high in colorful mounds under the warm glow of hanging lanterns.

A breathtaking image of the Northern Lights over a snowy Norwegian landscape, with a crystal-clear reflection in a still lake below.

A cat sitting in a small cardboard box, barely fitting but looking utterly content.

A high-resolution image of a cat with striking, mismatched eyes--one blue, one green--sitting on a vintage book in a cozy, sunlit window nook.

A panoramic image of the Northern Lights over a serene, snow-covered landscape, with a lone wooden cabin illuminated under the celestial green glow.

A photo of thousands of mirrors precisely aligned in the desert, capturing and reflecting the brilliant sunset, creating a breathtaking mosaic of light and color.

A photo of a cat standing in front of a vibrant, colorful mural with its shadow casting a silhouette of a lion.

A vibrant photo showing a market street in Tokyo at night, illuminated by countless neon signs and bustling with diverse crowds.

A panoramic image of the Milky Way arching over a serene mountain lake, reflected perfectly in the still water below.

A photo of Mount Fuji at sunrise, beautifully reflected in the still water of Lake Kawaguchi, surrounded by vibrant autumn leaves.

A surreal digital artwork featuring a giant octopus with its tentacles winding through an abandoned cityscape under a starry night sky.

A high-resolution photo of a vibrant, sprawling night market in Thailand, illuminated by hundreds of colorful lanterns and bustling with locals and tourists.

A vivid photograph capturing the silhouette of a tree against a luminous, multicolored aurora borealis in a starry night sky.

A picture of a fox sleeping on top of a bald eagle, both perched peacefully on a tree branch.

A panoramic view of the Milky Way arching over a tranquil, crystal-clear lake, reflecting the stars and galaxy above.

A breathtaking aerial view of a lush, green forest with a crystal-clear river winding through it, reflecting the sunlight.

A surrealist digital artwork depicting a gigantic cat lounging atop towering skyscrapers under a vivid, star-filled sky.

A vivid photo of the Milky Way arching over a silhouetted, ancient tree in a remote desert captures the stunning beauty of the cosmos contrasted with the starkness of Earth.

A stunning photograph of an underwater cave, illuminated by natural light filtering through the water, revealing vibrant marine life and rocky formations.

A fox peering curiously through a colorful autumn wreath hung on a rustic wooden door.

A curious cat peering through a magnifying glass at a map scattered with paw prints and old treasure icons.

A cat sneakily peering out from behind a pile of books on a desk.

A vivid sunset over a bustling cityscape, with silhouettes of cranes and skyscrapers under construction.

A lone tree thriving on the edge of a dramatically steep cliff, overlooking a misty valley as the sun sets.

A lone tree on a vast, sunlit savannah under a stormy sky, creating a stunning contrast between calm and turmoil.

A cat perched on a tiny, swaying branch, gazing intently at a butterfly hovering just inches away.

Two elderly men laugh heartily while playing chess in the park, their game board festooned with autumn leaves.

A curious cat peering through a colorful array of patterned glass windows.

A fox standing on a moss-covered log in a dense, misty forest.

Two elderly women laughing heartily as they ride a tandem bicycle through a sunlit park.

A serene sunset over a tranquil lake, with silhouettes of trees reflected perfectly in the water.

Two elderly women laugh heartily as they race each other in colorful, custom-made go-karts through a vibrant street market.

A cat wearing sunglasses, lounging in a mini beach chair under a palm tree.

A labyrinth of neon-lit streets bustling with people in the heart of Tokyo at night.

A bustling night market under a vibrant, starry sky, illuminated by colorful paper lanterns.

A vivid sunset over a bustling cityscape, silhouetting the busy outlines of moving people and cars.

A solitary tree standing resilient amidst the sprawling majesty of the salt flats, its reflection mirroring in the water during sunset.

A vibrant sunset silhouette with a bicycle leaning against a lone tree.  
A breathtaking view from the summit of a mountain, overlooking a vast landscape bathed in the golden glow of sunrise.  
A lone tree on a misty hill illuminated by the soft golden light of sunrise, casting a long shadow.  
A man in a vibrant hot air balloon floats above a historic castle at sunrise.  
A child teaching an elderly man how to use a smartphone, both smiling in a sunlit park.  
A vivid sunset over a tranquil lake, silhouetting a lone fisherman in a small boat.  
A serene sunset over a bustling cityscape, capturing the calm amidst the chaos.  
A cat curiously peeking out from a pile of autumn leaves.  
A cat and a dog wearing astronaut helmets, sitting in a cardboard spaceship with a hand-drawn control panel.  
A hummingbird sipping nectar from a bright red flower as sunlight filters through its translucent wings.  
A hummingbird sipping nectar from a vibrant purple flower, with its wings a blur of motion.  
A fox napping peacefully on the hood of a snow-covered car under the northern lights.  
A lone tree on a vast, empty landscape under a swirling, starry night sky.  
A breathtaking view from the summit capturing the vibrant sunrise over a sea of clouds.  
A squirrel peering through a magnifying glass at a map spread out in front of it on a park bench.  
A cat perched on top of a tall stack of books, intently reading one of them.  
A soaring eagle clutching a colorful kite in its talons against a clear blue sky.  
A cat playfully peering out from inside a rolled-up carpet.  
A squirrel standing upright and using a tiny umbrella under a sunshower.  
A solitary tree stands resilient atop a vibrant, multicolored hill under a sprawling Milky Way galaxy.  
A lone hiker stands at the edge of a vast canyon, dwarfed by the expansive red rock formations under a stormy sky.  
A breathtaking view from the top of a mist-covered mountain at sunrise, showcasing a palette of vibrant oranges and soft blues.  
A vibrant hot air balloon floating gracefully above a misty mountain range at sunrise.  
A vivid sunset casting golden hues over a tranquil forest with deer grazing peacefully in a meadow.  
A dog wearing a tiny cowboy hat sitting beside a cactus at sunset.  
A group of gleaming hot air balloons ascending at sunrise over a misty mountain landscape.  
A vivid sunset over a tranquil lake, silhouetting a lone, slender tree against a fiery sky.  
A curious cat peering through a maze of colorful yarn balls, its eyes wide with wonder.  
A lone tree standing resilient amidst the sprawling sand dunes under a vast, cloudy sky.  
A man in a business suit skateboarding down a bustling city street.  
A vivid rainbow arcs gracefully over a quaint, cobblestone street lined with colorful, historic homes.  
A lone tree tops a vibrant green hill beneath a vast, star-filled night sky.  
A hiker standing atop a mountain, overlooking a cloud-filled valley as the sun rises.  
A vivid sunset reflecting on a tranquil lake, casting hues of orange and pink across the water.  
A skydiver's selfie with a stunning rainbow in the background.  
A hiker stands at the edge of a cliff, overlooking a vast landscape painted with the vibrant colors of sunset.  
A crystal-clear lake mirroring a vivid sunset sky, framed by silhouetted mountains.  
A vivid sunset over a tranquil lake, with silhouettes of birds returning to their nests in the foreground.  
A lone, ancient tree stands resilient atop a vibrant, sunlit hill, its branches sprawling wildly against a vivid sunset backdrop.  
A breathtaking panorama of Machu Picchu shrouded in mist at sunrise, with llamas grazing silently in the foreground.  
A brightly colored parrot perched on a moss-covered branch in a dense, sunlit rainforest.  
A person walking across a vividly colorful, geometrically-patterned street crossing in Tokyo at night.  
A lone tree stands resilient amidst the expansive, sunlit savannah, forming a stark silhouette against the vibrant sunset.  
A breathtaking view from a mountaintop as the sun sets, painting the sky in brilliant hues of orange and pink.  
A hiker pausing at the edge of a lush green cliff, overlooking a vast canyon painted in the hues of the sunset.  
A person reading a book under a giant mushroom-like tree in a luminous fantasy forest.  
A curious cat peeks through a stack of colorful hardback books, with its bright eyes wide in wonder.  
A man reading a book at the edge of a cliff as the sun sets over a vast ocean.  
A drone captures the vibrant hustle of a bustling night market, illuminated under a canopy of colorful lights.  
A cat perched precariously atop a thin door, eyes wide with surprise.  
A windsurfer gliding swiftly across a vibrant sunset ocean, the sky painted with shades of orange and pink.  
A winding river flowing through a colorful autumn forest, with leaves creating a mosaic of red, orange, and yellow.

A breathtaking aerial view of a vibrant coral reef surrounded by crystal-clear turquoise waters.  
Two dogs wearing sunglasses and bow ties sitting at a café table, each with a cup of coffee in front of them.  
A fox curiously peeking through a colorful autumn leaf pile.  
A hiker stands on a cliff's edge, overlooking a vast forest under a spectacular sunset.  
A cat staring intently at a bubble about to burst on the tip of its nose.  
A vivid sunset over a calm ocean, with a silhouette of a lone surfer walking towards the waves.  
A fox sleeping on top of a fluffy sheep under a starry sky.  
A man floats in mid-air as he reads a glowing book, surrounded by dark, whimsical forest scenery.  
A vintage bicycle parked against a colorful graffiti wall on a bustling city street.  
A serendipitous shot of a cat and a dog sitting side by side, gazing at a stunning sunset.  
A fox curiously peeking out from behind a colorful autumn tree, with its bright eyes gleaming in the soft morning light.  
A vivid photograph of a vibrant street market in Marrakesh, brimming with colorful spices and lively vendors.  
A raccoon peering through a colorful mosaic of autumn leaves.  
A dog wearing sunglasses and a bow tie, riding a skateboard down a bustling city street.  
A person walking their bicycle up a steep, colorful street in a quaint village.  
A cat intently reading a small newspaper on a tiny park bench.  
A man in a bright yellow raincoat standing under a multicolored umbrella in the middle of a sunlit, empty desert.  
An astronaut playing chess with a robot on Mars.  
A cat wearing goggles sitting in a miniature airplane made of books.
